# Supplementary material for: Mycorrhizal inoculation enhanced tillering in field grown wheat, nutritional enrichment and soil properties
Source: PeerJ journal article supplement (doi:10.7717/peerj.15686), 2023-09-13
Supplement: RawData.zip [file Data Analysis nutritional Feb 23 2023.xlsx]

## Sheet: Zinc 1
		R1	R2	R3	Average	S.D	S.E
	WO	2.7	3.2	3.4	3.1	0.360555	0.208167	b
	FD	3.4	3.5	3	3.3	0.264575	0.152753	b
	HD	3.4	3.1	3.1	3.2	0.173205	0.1	b
	MA+HD	4.2	3.7	4.4	4.1	0.360555	0.208167	a
	MD+HD	3	3.5	3.4	3.3	0.264575	0.152753	b
		Zn 1 Treatments	Values
		WO	2.7
		WO	3.2
		WO	3.4
		FD	3.4			Tukey Pairwise Comparisons
		FD	3.5			Grouping Information Using the Tukey Method and 95% Confidence
		FD	3			Zn 1
		HD	3.4			Treatments	N	Mean	Grouping
		HD	3.1			MA+HD	3	4.1	A
		HD	3.1			MD+HD	3	3.3		B
		MA+HD	4.2			FD	3	3.3		B
		MA+HD	3.7			HD	3	3.2		B
		MA+HD	4.4			WO	3	3.1		B
		MD+HD	3			Means that do not share a letter are significantly different.
		MD+HD	3.5
		MD+HD	3.4
																J

## Sheet: Zinc 2
		R1	R2	R3	Average	S.D	S.E
	WO	3	3.5	3.1	3.2	0.264575	0.152753	b
	FD	3.4	3.4	3	3.26667	0.23094	0.133333	ab
	HD	2.8	3.3	3.3	3.13333	0.288675	0.166667	b
	MA+HD	4.4	3.7	4.2	4.1	0.360555	0.208167	a
	MD+HD	3.7	3	3	3.23333	0.404145	0.233333	b
		Zn 2 Treatments	Values
		WO	3
		WO	3.5
		WO	3.1
		FD	3.4		Tukey Pairwise Comparisons
		FD	3.4		Grouping Information Using the Tukey Method and 95% Confidence
		FD	3		Zn 2
		HD	2.8		Treatments	N	Mean	Grouping
		HD	3.3		MA+HD	3	4.1	A
		HD	3.3		FD	3	3.267	A	B
		MA+HD	4.4		MD+HD	3	3.233		B
		MA+HD	3.7		WO	3	3.2		B
		MA+HD	4.2		HD	3	3.133		B
		MD+HD	3.7		Means that do not share a letter are significantly different.
		MD+HD	3
		MD+HD	3
																J
