# Supplementary material for: Mycorrhizal inoculation enhanced tillering in field grown wheat, nutritional enrichment and soil properties
Source: PeerJ journal article supplement (doi:10.7717/peerj.15686), 2023-09-13
Supplement: RawData.zip [file Data Analysis nutritional Feb 23 20230.xlsx]

## Sheet: PROTEIN SITE 1
		R1	R2	R3	Average	S.D	S.E
	WO	10.5	11	11.5	11	0.5	0.288675
	FD	12.3	13	13.7	13	0.7	0.404145
	HD	13.2	12	13.1	12.7667	0.665833	0.384419
	MA+HD	14.5	14.3	15.2	14.6667	0.472582	0.272845
	MD+HD	12.4	13.4	13	12.9333	0.503322	0.290593
		Treatments	Values
		WO	10.5
		WO	11
		WO	11.5
		FD	12.3
		FD	13
		FD	13.7
		HD	13.2
		HD	12
		HD	13.1
		MA+HD	14.5
		MA+HD	14.3
		MA+HD	15.2
		MD+HD	12.4
		MD+HD	13.4
		MD+HD	13
																J

## Sheet: PROTEIN SITE 2
		R1	R2	R3	Average	S.D	S.E
	WO	11.5	11.4	12.8	11.9	0.781025	0.450925
	FD	12.9	13.3	14	13.4	0.556776	0.321455
	HD	13.5	12	13.5	13	0.866025	0.5
	MA+HD	15.5	15.7	16.5	15.9	0.52915	0.305505
	MD+HD	12.4	12.6	13.4	12.8	0.52915	0.305505
		Treatments	Values
		WO	11.5
		WO	11.4
		WO	12.8
		FD	12.9
		FD	13.3
		FD	14
		HD	13.5
		HD	12
		HD	13.5
		MA+HD	15.5
		MA+HD	15.7
		MA+HD	16.5
		MD+HD	12.4
		MD+HD	12.6
		MD+HD	13.4
																J

## Sheet: Zinc 1
		R1	R2	R3	Average	S.D	S.E
	WO	2.7	3.2	3.4	3.1	0.360555	0.208167
	FD	3.4	3.5	3	3.3	0.264575	0.152753
	HD	3.4	3.1	3.1	3.2	0.173205	0.1
	MA+HD	4.2	3.7	4.4	4.1	0.360555	0.208167
	MD+HD	3	3.5	3.4	3.3	0.264575	0.152753
		Zn 1 Treatments	Values
		WO	2.7
		WO	3.2
		WO	3.4
		FD	3.4
		FD	3.5
		FD	3
		HD	3.4
		HD	3.1
		HD	3.1
		MA+HD	4.2
		MA+HD	3.7
		MA+HD	4.4
		MD+HD	3
		MD+HD	3.5
		MD+HD	3.4
																J

## Sheet: Zinc 2
		R1	R2	R3	Average	S.D	S.E
	WO	3	3.5	3.1	3.2	0.264575	0.152753
	FD	3.4	3.4	3	3.26667	0.23094	0.133333
	HD	2.8	3.3	3.3	3.13333	0.288675	0.166667
	MA+HD	4.4	3.7	4.2	4.1	0.360555	0.208167
	MD+HD	3.7	3	3	3.23333	0.404145	0.233333
		Zn 2 Treatments	Values
		WO	3
		WO	3.5
		WO	3.1
		FD	3.4
		FD	3.4
		FD	3
		HD	2.8
		HD	3.3
		HD	3.3
		MA+HD	4.4
		MA+HD	3.7
		MA+HD	4.2
		MD+HD	3.7
		MD+HD	3
		MD+HD	3
																J

## Sheet: iron 1
		R1	R2	R3	Average	S.D	S.E
	WO	3.5	3.7	3.3	3.5	0.2	0.11547
	FD	3.8	3.5	3.8	3.7	0.173205	0.1
	HD	3.8	3.6	4	3.8	0.2	0.11547
	MA+HD	4.8	4.6	4.4	4.6	0.2	0.11547
	MD+HD	3.7	3.9	3.8	3.8	0.1	0.057735
		Treatments	Values
		WO	3.5
		WO	3.7
		WO	3.3
		FD	3.8
		FD	3.5
		FD	3.8
		HD	3.8
		HD	3.6
		HD	4
		MA+HD	4.8
		MA+HD	4.6
		MA+HD	4.4
		MD+HD	3.7
		MD+HD	3.9
		MD+HD	3.8
																J

## Sheet: iron 2
		R1	R2	R3	Average	S.D	S.E
	WO	4.3	3.9	4.1	4.1	0.2	0.11547
	FD	4.9	4.5	4.7	4.7	0.2	0.11547
	HD	4.6	4.3	4.6	4.5	0.173205	0.1
	MA+HD	5	5.3	5.3	5.2	0.173205	0.1
	MD+HD	4.8	4.6	4.7	4.7	0.1	0.057735
		Treatments	Values
		WO	4.3
		WO	3.9
		WO	4.1
		FD	4.9
		FD	4.5
		FD	4.7
		HD	4.6
		HD	4.3
		HD	4.6
		MA+HD	5
		MA+HD	5.3
		MA+HD	5.3
		MD+HD	4.8
		MD+HD	4.6
		MD+HD	4.7
																J

## Sheet: Phosphorus 1
		R1	R2	R3	Average	S.D	S.E
	WO	265	260	285	270	13.2288	7.63763
	FD	308	294	328	310	17.088	9.86577
	HD	299	291	310	300	9.53939	5.50757
	MA+HD	359	358	378	365	11.2694	6.50641
	MD+HD	294	298	326	306	17.4356	10.0664
			Treatments	Values
			WO	265
			WO	260
			WO	285
			FD	308
			FD	294
			FD	328
			HD	299
			HD	291
			HD	310
			MA+HD	359
			MA+HD	358
			MA+HD	378
			MD+HD	294
			MD+HD	298
			MD+HD	326
																J

## Sheet: Phosphorus (2)
		R1	R2	R3	Average	S.D	S.E
	WO	280	276	290	282	7.2111	4.16333
	FD	324	313	320	319	5.56776	3.21455
	HD	282	317	295	298	17.6918	10.2144
	MA+HD	396	380	394	390	8.7178	5.03322
	MD+HD	290	294	316	300	14	8.0829
		Treatments	Values
		WO	280
		WO	276
		WO	290
		FD	324
		FD	313
		FD	320
		HD	282
		HD	317
		HD	295
		MA+HD	396
		MA+HD	380
		MA+HD	394
		MD+HD	290
		MD+HD	294
		MD+HD	316
																J

## Sheet: Potassium 1
		R1	R2	R3	Average	S.D	S.E
	WO	340	327	353	340	13	7.50555
	FD	398	372	400	390	15.6205	9.0185
	HD	370	365	402	379	20.0749	11.5902
	MA+HD	424	436	445	435	10.5357	6.08276
	MD+HD	385	389	363	379	14	8.0829
		Treatments	Values
		WO	340
		WO	327
		WO	353
		FD	398
		FD	372
		FD	400
		HD	370
		HD	365
		HD	402
		MA+HD	424
		MA+HD	436
		MA+HD	445
		MD+HD	385
		MD+HD	389
		MD+HD	363
																J

## Sheet: Potassium (2)
		R1	R2	R3	Average	S.D	S.E
	WO	310	306	320	312	7.2111	4.16333
	FD	365	365	386	372	12.1244	7
	HD	356	356	368	360	6.9282	4
	MA+HD	392	395	413	400	11.3578	6.55744
	MD+HD	362	385	366	371	12.2882	7.0946
		Treatments	Values
		WO	310
		WO	306
		WO	320
		FD	365
		FD	365
		FD	386
		HD	356
		HD	356
		HD	368
		MA+HD	392
		MA+HD	395
		MA+HD	413
		MD+HD	362
		MD+HD	385
		MD+HD	366
																J

[truncated: 2 more sheets: CAR1 (2), CAR1]
