# Supplementary material for: Mycorrhizal inoculation enhanced tillering in field grown wheat, nutritional enrichment and soil properties
Source: PeerJ journal article supplement (doi:10.7717/peerj.15686), 2023-09-13
Supplement: RawData.zip [file Fig 1AB Percent spore share Feb 23 2023.xlsx]

## Sheet: Fig 1A % spore share pre sowing
	Pre sowing
		Site-1	Site-2	Site-1	Site-2
	Acaulospora spp.	3.5	1	f-h	hi
	Ambispora fennica	6.1	0	ef	i
	Diversispora spp.	4.7	3.9	e-g	f-h
	Claroideoglomus etunicatum	12.6	16	d	cd
	Rhizoglomus intraradices	15.3667	19.2	d	c
	Rhizophagus iranicus	3.9	1	f-h	hi
	Claroideoglomus lamellosum	25.7	32.8	b	a
	Claroideoglomus luteum	3.9	0	f-h	i
	Funneliformis mosseae	19.1	16	c	cd
	Paraglomus spp.	1.7	2.5	g-i	g-i
	Scutellospora spp.	3.4	7.6	f-i	e
				Site-1
					Acaulospora spp.	Ambispora fennica	Diversispora spp.	Claroideoglomus etunicatum	Rhizoglomus intraradices	Rhizophagus iranicus	Claroideoglomus lamellosum	Claroideoglomus luteum	Funneliformis mosseae	Paraglomus spp.	Scutellospora spp.
				R1	3.3	6.1	5.3	13.8	16.1	3.7	24.6	3.6	17.3	1.3	3.2
				R2	3.7	5.5	4	13	16	3.9	23.5	4.1	21	1.8	3.5
				R3	3.5	6.7	4.8	11	14	4.1	29	4	19	2	3.5
				Average	3.5	6.1	4.7	12.6	15.3667	3.9	25.7	3.9	19.1	1.7	3.4
				SD	0.2	0.6	0.655744	1.44222	1.18462	0.2	2.91033	0.264575	1.85203	0.360555	0.173205
				SE	0.11547	0.34641	0.378594	0.832666	0.683943	0.11547	1.68028	0.152753	1.06927	0.208167	0.1
				Site-2
					Acaulospora spp.	Ambispora fennica	Diversispora spp.	Claroideoglomus etunicatum	Rhizoglomus intraradices	Rhizophagus iranicus	Claroideoglomus lamellosum	Claroideoglomus luteum	Funneliformis mosseae	Paraglomus spp.	Scutellospora spp.
				R1	0.9	0	4	15.2	18.6	1	35	0	17.1	2.9	7.1
				R2	1.2	0	3.7	17.8	18	1.1	31	0	16	2.5	8.1
				R3	0.9	0	4	15	21	0.9	32.4	0	14.9	2.1	7.6
				Average	1	0	3.9	16	19.2	1	32.8	0	16	2.5	7.6
				SD	0.173205	0	0.173205	1.56205	1.58745	0.1	2.02978	0	1.1	0.4	0.5
				SE	0.1	0	0.1	0.90185	0.916515	0.057735	1.17189	0	0.635085	0.23094	0.288675
Anova
mycorrhizal species	Site 1	Site 2				Tukey Pairwise Comparisons: Location*mycorrhizal species
Acaulospora spp.	3.3	0.9				Grouping Information Using the Tukey Method and 95% Confidence
Acaulospora spp.	3.7	1.2				Location*mycorrhizal species	N	Mean	Grouping
Acaulospora spp.	3.5	0.9				Site 2 Claroideoglomus lamellosum	3	32.8	A
Ambispora fennica	6.1	0				Site 1 Claroideoglomus lamellosum	3	25.7		B
Ambispora fennica	5.5	0				Site 2 Rhizoglomus intraradices	3	19.2			C
Ambispora fennica	6.7	0				Site 1 Funneliformis mosseae	3	19.1			C
Diversispora spp.	5.3	4				Site 2 Funneliformis mosseae	3	16			C	D
Diversispora spp.	4	3.7				Site 2 Claroideoglomus etunicatum	3	16			C	D
Diversispora spp.	4.8	4				Site 1 Rhizoglomus intraradices	3	15.3667				D
Claroideoglomus etunicatum	13.8	15.2				Site 1 Claroideoglomus etunicatum	3	12.6				D
Claroideoglomus etunicatum	13	17.8				Site 2 Scutellospora spp.	3	7.6					E
Claroideoglomus etunicatum	11	15				Site 1 Ambispora fennica	3	6.1					E	F
Rhizoglomus intraradices	16.1	18.6				Site 1 Diversispora spp.	3	4.7					E	F	G
Rhizoglomus intraradices	16	18				Site 2 Diversispora spp.	3	3.9						F	G	H
Rhizoglomus intraradices	14	21				Site 1 Claroideoglomus luteum	3	3.9						F	G	H
Rhizophagus iranicus	3.7	1				Site 1 Rhizophagus iranicus	3	3.9						F	G	H
Rhizophagus iranicus	3.9	1.1				Site 1 Acaulospora spp.	3	3.5						F	G	H
Rhizophagus iranicus	4.1	0.9				Site 1 Scutellospora spp.	3	3.4						F	G	H	I
Claroideoglomus lamellosum	24.6	35				Site 2 Paraglomus spp.	3	2.5							G	H	I
Claroideoglomus lamellosum	23.5	31				Site 1 Paraglomus spp.	3	1.7							G	H	I
Claroideoglomus lamellosum	29	32.4				Site 2 Rhizophagus iranicus	3	1								H	I
Claroideoglomus luteum	3.6	0				Site 2 Acaulospora spp.	3	1								H	I
Claroideoglomus luteum	4.1	0				Site 2 Ambispora fennica	3	0									I
Claroideoglomus luteum	4	0				Site 2 Claroideoglomus luteum	3	0									I
Funneliformis mosseae	17.3	17.1				Means that do not share a letter are significantly different.
Funneliformis mosseae	21	16
Funneliformis mosseae	19	14.9
Paraglomus spp.	1.3	2.9
Paraglomus spp.	1.8	2.5
Paraglomus spp.	2	2.1
Scutellospora spp.	3.2	7.1
Scutellospora spp.	3.5	8.1
Scutellospora spp.	3.5	7.6

## Sheet: Fig 1 B% spore share after harv
	After harvest
		Site-1	Site-2	Site-1	Site-2
	Acaulospora spp.	4.1	6	gh	g
	Ambispora fennica	0	0	i	i
	Diversispora spp.	1	6.8	i	g
	Claroideoglomus etunicatum	6.9	6	g	g
	Rhizoglomus intraradices	13	17	d	e
	Rhizophagus iranicus	10	5.3	f	g
	Claroideoglomus lamellosum	31	31	b	b
	Claroideoglomus luteum	0	0	i	i
	Funneliformis mosseae	34	26.6667	a	c
	Paraglomus spp.	0	0	i	i
	Scutellospora spp.	0	1.2	a	hi
				Site-1
					Acaulospora spp.	Ambispora fennica	Diversispora spp.	Claroideoglomus etunicatum	Rhizoglomus intraradices	Rhizophagus iranicus	Claroideoglomus lamellosum	Claroideoglomus luteum	Funneliformis mosseae	Paraglomus spp.	Scutellospora spp.
				R1	4.3	0	0.9	7.1	13.8	8.9	30	0	32	0	0
				R2	4	0	1.1	6.7	12.2	10	29.5	0	33.6	0	0
				R3	4	0	1	6.9	13	11.1	33.5	0	36.4	0	0
				Average	4.1	0	1	6.9	13	10	31	0	34	0	0
				SD	0.173205	0	0.1	0.2	0.8	1.1	2.17945	0	2.22711	0	0
				SE	0.1	0	0.057735	0.11547	0.46188	0.635085	1.25831	0	1.28582	0	0
				Site-2
					Acaulospora spp.	Ambispora fennica	Diversispora spp.	Claroideoglomus etunicatum	Rhizoglomus intraradices	Rhizophagus iranicus	Claroideoglomus lamellosum	Claroideoglomus luteum	Funneliformis mosseae	Paraglomus spp.	Scutellospora spp.
				R1	6.3	0	7	5.2	16.8	5	32.2	0	26.1	0	1.2
				R2	6	0	7	7	16.4	5	31	0	24.9	0	1.1
				R3	5.7	0	6.4	5.8	17.8	5.9	29.8	0	29	0	1.3
				Average	6	0	6.8	6	17	5.3	31	0	26.6667	0	1.2
				SD	0.3	0	0.34641	0.916515	0.72111	0.519615	1.2	0	2.10792	0	0.1
				SE	0.173205	0	0.2	0.52915	0.416333	0.3	0.69282	0	1.21701	0	0.057735
Anova
mycorrhizal species	Site 1	Site 2
Acaulospora spp.	4.3	6.3
Acaulospora spp.	4	6
Acaulospora spp.	4	5.7			Tukey Pairwise Comparisons: Location*mycorrhizal species
Ambispora fennica	0	0			Grouping Information Using the Tukey Method and 95% Confidence
Ambispora fennica	0	0			Location*mycorrhizal species	N	Mean	Grouping
Ambispora fennica	0	0			Site 1 Funneliformis mosseae	3	34	A
Diversispora spp.	0.9	7			Site 1 Claroideoglomus lamellosum	3	31		B
Diversispora spp.	1.1	7			Site 2 Claroideoglomus lamellosum	3	31		B
Diversispora spp.	1	6.4			Site 2 Funneliformis mosseae	3	26.6667			C
Claroideoglomus etunicatum	7.1	5.2			Site 2 Rhizoglomus intraradices	3	17				D
Claroideoglomus etunicatum	6.7	7			Site 1 Rhizoglomus intraradices	3	13					E
Claroideoglomus etunicatum	6.9	5.8			Site 1 Rhizophagus iranicus	3	10						F
Rhizoglomus intraradices	13.8	16.8			Site 1 Claroideoglomus etunicatum	3	6.9							G
Rhizoglomus intraradices	12.2	16.4			Site 2 Diversispora spp.	3	6.8							G
Rhizoglomus intraradices	13	17.8			Site 2 Claroideoglomus etunicatum	3	6							G
Rhizophagus iranicus	8.9	5			Site 2 Acaulospora spp.	3	6							G
Rhizophagus iranicus	10	5			Site 2 Rhizophagus iranicus	3	5.3							G
Rhizophagus iranicus	11.1	5.9			Site 1 Acaulospora spp.	3	4.1							G	H
Claroideoglomus lamellosum	30	32.2			Site 2 Scutellospora spp.	3	1.2								H	I
Claroideoglomus lamellosum	29.5	31			Site 1 Diversispora spp.	3	1									I
Claroideoglomus lamellosum	33.5	29.8			Site 1 Ambispora fennica	3	0									I
Claroideoglomus luteum	0	0			Site 2 Ambispora fennica	3	0									I
Claroideoglomus luteum	0	0			Site 2 Claroideoglomus luteum	3	0									I
Claroideoglomus luteum	0	0			Site 1 Scutellospora spp.	3	0									I
Funneliformis mosseae	32	26.1			Site 2 Paraglomus spp.	3	0									I
Funneliformis mosseae	33.6	24.9			Site 1 Claroideoglomus luteum	3	0									I
Funneliformis mosseae	36.4	29			Site 1 Paraglomus spp.	3	0									I
Paraglomus spp.	0	0			Means that do not share a letter are significantly different.
Paraglomus spp.	0	0
Paraglomus spp.	0	0
Scutellospora spp.	0	1.2
Scutellospora spp.	0	1.1
Scutellospora spp.	0	1.3
