# Supplementary material for: Mycorrhizal inoculation enhanced tillering in field grown wheat, nutritional enrichment and soil properties
Source: PeerJ journal article supplement (doi:10.7717/peerj.15686), 2023-09-13
Supplement: RawData.zip [file Graphs Feb 23 2023 pasted in paper.xlsx]

## Sheet: Fig 2 Height of plant
	Site-1
Control	69.53
FD	81.9
HD	74.7		ok
MA+HD	83.83
MD+HD	73.7
	Site-2
WO	69.7
FD	78.97
HD	75.97
MA+HD	85.3
MD+HD	75.47
St.error	1.3	1.3	0.83	0.76	1.19
	0.981	0.5	1.2	0.8	1.17

## Sheet: Fig 3 Tiller per plant
	Site-1
WO	9.266
FD	10.2
HD	10.266
MA+HD	14.233
MD+HD	9.633
	Site-2
WO	8.966
FD	10.533
HD	10.266
MA+HD	13.7
MD+HD	9.166
St.error	0.12	0.38	0.12	0.11	0.17
	0.11	0.1	0.125	0.38	0.125

## Sheet: Fig 4 Dry mass
	Site-1
WO	17.473
FD	20.463
HD	19.506
MA+HD	22.596	ok
MD+HD	19.25
	Site-2
WO	16.656
FD	18.916
HD	17.866
MA+HD	20.9
MD+HD	18.3
St.error	0.33	0.61	0.56	0.53	0.54
	0.32	0.14	0.16	0.7	0.51

## Sheet: Fig 5 Grain yield
	Site-1
WO	6.4
FD	7.42
HD	6.81
MA+HD	8.08
MD+HD	6.677
	Site-2
WO	5.91
FD	7.636
HD	6.576
MA+HD	8
MD+HD	6.6
St.error	0.09	0.29	0.088	0.19	0.3
	0.1	0.14	0.14	0.14	0.125

## Sheet: Fig 6 Hay Weight
	Site-1					Ok						ok
WO	11.067
FD	13.033
HD	12.66
MA+HD	14.5
MD+HD	12.6
	Site-2
WO	10.7
FD	11.28
HD	11.08
MA+HD	12.933
MD+HD	11.676
							14.48								16.7
										15.33 as compared to site 1
										Site 1				site 2			Use this Oct 8 2020 Used	site 2
St.error	0.14	0.16	0.6	0.2	0.19
	0.11	0.14	0.42	0.24	0.2					MA +HD	MD +HD			MA +HD	MD +HD			MA +HD	MD +HD
									Hay wt	14.5	12.6		Hay wt	12.36	11.676		Hay wt	12.9	11.676
									grain yield	8.083	6.676		grain yield	7.426	7.406		grain yield	8	6.6
										22.583	19.276			19.786	19.082			20.9	18.276
									Dry biomass	22.596	19.25		Dry biomass	19.786	19.083		Dry biomass	20.9	18.276

## Sheet: Fig 7 1000GW
	Site-1
WO	41
FD	48.43
HD	44.23
MA+HD	44.53
MD+HD	44.2
	Site-2
WO	40.3
FD	49.3
HD	42.54
MA+HD	44.8
MD+HD	43.93
							0.02								0.0536
St.error	0.7	0.98	0.8	0.98	0.94
	0.8	0.8	0.94	0.55	0.54
