# Supplementary material for: Mycorrhizal inoculation enhanced tillering in field grown wheat, nutritional enrichment and soil properties
Source: PeerJ journal article supplement (doi:10.7717/peerj.15686), 2023-09-13
Supplement: RawData.zip [file Replicate file Feb 23 2023.xlsx]

## Sheet: Fig 2 Plant Height
	Site-1	Site-2
WO	72.5	68		WO	72.5	68	FD	85	80	HD	76	74.6	MA+HD	82	85.3	MD+HD	74	76.7
WO	69	72			69	72		79.7	78.9		72.7	78.9		85	87		71	72.6
WO	67.1	69			67.1	69		81	78		75.4	74.4		84.5	83.6		76	77.1
FD	85	80			69.5333	69.6667		81.9	78.9667		74.7	75.9667		83.8333	85.3		73.6667	75.4667
FD	79.7	78.9		St.de	2.23656	1.69967		2.25536	0.817856		1.43527	2.07579		1.31233	1.38804		2.0548	2.03361
FD	81	78		St.error	1.29128	0.981307		1.30213	0.47219		0.828654	1.19846		0.757677	0.801388		1.18634	1.1741
HD	76	74.6
HD	72.7	78.9
HD	75.4	74.4
MA+HD	82	85.3
MA+HD	85	87
MA+HD	84.5	83.6
MD+HD	74	76.7
MD+HD	71	72.6			Site-1	Site-2
MD+HD	76	77.1		WO	b	c
				FD	a	b
				HD	b	b
				MA+HD	a	a
				MD+HD	b	b

## Sheet: Fig 3 tillers per plant
	Site-1	Site-2
WO	9.266	8.966		WO	9.266	8.966	FD	10.2	10.533	HD	10.266	10.266	MA+HD	14.233	13.7	MD+HD	9.633	9.166
WO	9.521	9.211			9.521	9.211		11	10.765		10.01	10		13.998	14.5		9.279	9.432
WO	9.011	8.721			9.011	8.721		9.4	10.301		10.522	10.532		14.468	12.9		9.987	8.9
FD	10.2	10.533			9.266	8.966		10.2	10.533		10.266	10.266		14.233	13.7		9.633	9.166
FD	11	10.765		St.de	0.208207	0.200042		0.653197	0.189427		0.209023	0.217188		0.191877	0.653197		0.28904	0.217188
FD	9.4	10.301		St.error	0.120208	0.115494		0.377124	0.109366		0.12068	0.125394		0.11078	0.377124		0.166877	0.125394
HD	10.266	10.266
HD	10.01	10
HD	10.522	10.532
MA+HD	14.233	13.7
MA+HD	13.998	14.5
MA+HD	14.468	12.9
MD+HD	9.633	9.166
MD+HD	9.279	9.432			Site-1	Site-2
MD+HD	9.987	8.9		WO	b	d
				FD	b	b
				HD	b	bc
				MA+HD	a	a
				MD+HD	b	cd

## Sheet: Fig 4 dry mass
	Site-1	Site-2
WO	17.473	16.656		WO	17.473	16.656	FD	20.463	18.916	HD	18.506	17.866	MA+HD	21.596	20	MD+HD	18.25	19.5
WO	18.17	15.98			18.17	15.98		19.161	19.21		20.825	18.198		23.83	20		20.49	17.4
WO	16.776	17.332			16.776	17.332		21.765	18.622		19.187	17.534		22.362	22.7		19.01	18
FD	20.463	18.916			17.473	16.656		20.463	18.916		19.506	17.866		22.596	20.9		19.25	18.3
FD	19.161	19.21		St.de	0.569098	0.551952		1.06308	0.24005		0.973229	0.271077		0.926915	1.27279		0.93009	0.883176
FD	21.765	18.622		St.error	0.328569	0.318669		0.613769	0.138593		0.561894	0.156506		0.535154	0.734847		0.536987	0.509902
HD	18.506	17.866
HD	20.825	18.198
HD	19.187	17.534
MA+HD	21.596	20
MA+HD	23.83	20
MA+HD	22.362	22.7
MD+HD	18.25	19.5
MD+HD	20.49	17.4
MD+HD	19.01	18				Site-1	Site-2
					WO	c	b
					FD	ab	ab
					HD	bc	b
					MA+HD	a	a
					MD+HD	bc	b

## Sheet: Fig 5 grain yield
	Site-1	Site-2
WO	6.4	5.91		WO	6.4	5.91	FD	6.72	7.636	HD	6.8	6.576	MA+HD	8.089	8.3	MD+HD	7	6.3
WO	6.2	6.12			6.2	6.12		7.7	7.941		7	6.284		7.66	8		6.03	6.8
WO	6.6	5.7			6.6	5.7		7.84	7.331		6.63	6.868		8.5	7.7		7	6.7
FD	6.72	7.636			6.4	5.91		7.42	7.636		6.81	6.576		8.083	8		6.67667	6.6
FD	7.7	7.941		St.de	0.163299	0.171464		0.498264	0.249031		0.151217	0.238417		0.342955	0.244949		0.457262	0.216025
FD	7.84	7.331		St.error	0.0942809	0.0989949		0.287673	0.143778		0.0873053	0.13765		0.198005	0.141421		0.264001	0.124722
HD	6.8	6.576												8.083
HD	7	6.284
HD	6.63	6.868
MA+HD	8.089	8.3
MA+HD	7.66	8
MA+HD	8.5	7.7
MD+HD	7	6.3
MD+HD	6.03	6.8
MD+HD	7	6.7				Site-1	Site-2
					WO	b	b
					FD	ab	a
					HD	b	b
					MA+HD	a	a
					MD+HD	b	b

## Sheet: Fig 6 hay wt
	Site-1	Site-2
WO	10.8	10.746
WO	11.4	10.492		WO	10.8	10.746	FD	12.7	11.28	HD	12.66	12	MA+HD	14.5	13.4	MD+HD	12.6	11.676
WO	11	11			11.4	10.492		13	10.98		11.35	10.22		14	12.4		13	12.078
FD	12.7	11.28			11	11		13.4	11.58		14	11.02		15	13		12.2	11.274
FD	13	10.98			11.0667	10.746		13.0333	11.28		12.67	11.08		14.5	12.9333		12.6	11.676
FD	13.4	11.58		St.de	0.249444	0.20739		0.286744	0.244949		1.08188	0.727919		0.408248	0.410961		0.326599	0.328232
HD	12.66	12		St.error	0.144016	0.119737		0.165552	0.141421		0.624624	0.420264		0.235702	0.237268		0.188562	0.189505
HD	11.35	10.22
HD	14	11.02
MA+HD	14.5	13.4
MA+HD	14	12.4
MA+HD	15	13
MD+HD	12.6	11.676
MD+HD	13	12.078
MD+HD	12.2	11.274				Site-1	Site-2
					WO	c	b
					FD	ab	b
					HD	a-c	b
					MA+HD	a	a
					MD+HD	bc	ab

## Sheet: Fig 7 1000 GRW
	Site-1	Site-2
WO	39.5	38.5		WO	39.5	38.5	FD	48	49.5	HD	44.2	44.52	MA+HD	45.2	44	MD+HD	42.2	45.1
WO	42.5	42			42.5	42		50.7	51		46	40.5		42.2	46.1		46.2	42.8
WO	41	40.3			41	40.3		46.6	47.4		42.5	42.6		46.2	44.2		44.2	43.9
FD	48	49.5			41	40.2667		48.4333	49.3		44.2333	42.54		44.5333	44.7667		44.2	43.9333
FD	50.7	51		St.de	1.22474	1.42906		1.70163	1.47648		1.42906	1.64171		1.69967	0.946338		1.63299	0.939267
FD	46.6	47.4		St.error	0.707107	0.82507		0.982438	0.852447		0.82507	0.94784		0.981307	0.546368		0.942809	0.542286
HD	44.2	44.52
HD	46	40.5
HD	42.5	42.6
MA+HD	45.2	44
MA+HD	42.2	46.1
MA+HD	46.2	44.2
MD+HD	42.2	45.1
MD+HD	46.2	42.8				Site-1	Site-2
MD+HD	44.2	43.9			WO	b	c
					FD	a	a
					HD	ab	bc
					MA+HD	ab	b
					MD+HD	ab	bc
