# Supplementary material for: Mycorrhizal inoculation enhanced tillering in field grown wheat, nutritional enrichment and soil properties
Source: PeerJ journal article supplement (doi:10.7717/peerj.15686), 2023-09-13
Supplement: RawData.zip [file Site 1 Soil Feb 23 2023.xlsx]

## Sheet: Saturation % age
	New table Table 1 Pre-sowing and Post-harvesting Soil Properties at site-I
	Treatments			PS		PH			PS	PH		PS			PH
												1	40	1	38
												1	39	1	36
1	WO (Control)	R1		40		38		WO	39.33	36.67		1	39	1	36
		R2		39		36		FD	39	43		2	40	2	44
		R3		39		36		HD	41	41.33		2	40	2	44
	38	Mean		39.3333	38	36.6667	36	MA HD	41	55		2	37	2	41
								MD HD	40	42		3	40	3	43
2	FD	R1		40		44			40.066	43.6		3	41	3	41
		R2		40		44						3	42	3	40
		R3		37		41						4	42	4	56
	39	Mean		39	39	43	43					4	41	4	53
												4	40	4	56
3	HD	R1		40		43						5	42	5	40
		R2		41		41						5	39	5	43
		R3		42		40						5	39	5	43
	42	Mean		41	42	41.3333	41.3333
											WO		FD		HD		MA HD		MD HD
4	MA+HD	R1		42		56					40	38	40	44	40	43	42	56	42	40
		R2		41		53					39	36	40	44	41	41	41	53	39	43
		R3		40		56					39	36	37	41	42	40	40	56	39	43
	41	Mean		41	41	55	55				39.3333	36.6667	39	43	41	41.3333	41	55	40	42
										St.de	0.57735	1.1547	1.73205	1.73205	1	1.52753	1	1.73205	1.73205	1.73205
5	MD+HD	R1		42		40				St.error	0.333333	0.666667	1	1	0.57735	0.881917	0.57735	1	1	1
		R2		39		43
		R3		39		43
	40	Mean		40	40	42	42

## Sheet: Soil pH
	New table Table 1 Pre-sowing and Post-harvesting Soil Properties at site-I
	Treatments			PS		PH			PS	PH			PS		PH
												1	7	1	7
												1	7.4	1	7
1	WO (Control)	R1		7		7		WO	7.2	6.9		1	7.2	1	6.7
		R2		7.4		7		FD	7.1	7		2	7.3	2	6.8
		R3		7.2		6.7		HD	7.1	7		2	7.1	2	7.1
	7.2	Mean		7.2		6.9	6.9	MA HD	7.2	6.3		2	6.9	2	7.1
								MD HD	7	6.9		3	7	3	7
2	FD	R1		7.3		6.8						3	7	3	6.9
		R2		7.1		7.1						3	7.3	3	7.1
		R3		6.9		7.1						4	7.1	4	6.5
	7.1	Mean		7.1		7	7					4	7.1	4	6
												4	7.4	4	6.4
3	HD	R1		7		7						5	6.8	5	6.8
		R2		7		6.9						5	7	5	6.8
		R3		7.3		7.1						5	7.2	5	7.1
	7.1	Mean		7.1		7	7
										WO		FD		HD		MA HD		MD HD
4	MA+HD	R1		7.1		6.5				7	7	7.3	6.8	7	7	7.1	6.5	6.8	6.8
		R2		7.1		6				7.4	7	7.1	7.1	7	6.9	7.1	6	7	6.8
		R3		7.4		6.4				7.2	6.7	6.9	7.1	7.3	7.1	7.4	6.4	7.2	7.1
	7.2	Mean		7.2		6.3	6.3			7.2	6.9	7.1	7	7.1	7	7.2	6.3	7	6.9
									St.de	0.2	0.173205	0.2	0.173205	0.173205	0.1	0.173205	0.264575	0.2	0.173205
5	MD+HD	R1		6.8		6.8			St.error	0.11547	0.1	0.11547	0.1	0.1	0.057735	0.1	0.152753	0.11547	0.1
		R2		7		6.8
		R3		7.2		7.1
	7	Mean		7		6.9	6.9

## Sheet: EC dSm-1
	New table Table 1 Pre-sowing and Post-harvesting Soil Properties at site-I
	Treatments			PS		PH			PS	PH			PS		PH
												1	0.74	1	0.72
												1	0.77	1	0.7
1	WO (Control)	R1		0.74		0.72		WO	0.75	0.7		1	0.74	1	0.68
		R2		0.77		0.7		FD	0.78	0.8		2	0.78	2	0.81
		R3		0.74		0.68		HD	0.77	0.8		2	0.8	2	0.82
	0.75	Mean		0.75		0.7	0.7	MA HD	0.78	1.17		2	0.76	2	0.77
								MD HD	0.76	0.81		3	0.77	3	0.81
2	FD	R1		0.78		0.81						3	0.74	3	0.8
		R2		0.8		0.82						3	0.8	3	0.79
		R3		0.76		0.77						4	0.78	4	1.18
	0.78	Mean		0.78		0.8	0.8					4	0.77	4	1.18
												4	0.79	4	1.15
3	HD	R1		0.77		0.81						5	0.75	5	0.81
		R2		0.74		0.8						5	0.75	5	0.84
		R3		0.8		0.79						5	0.78	5	0.78
	0.77	Mean		0.77		0.8	0.8
										WO		FD		HD		MA HD		MD HD
										0.74	0.72	0.78	0.81	0.77	0.81	0.78	1.18	0.75	0.81
4	MA+HD	R1		0.78		1.18				0.77	0.7	0.8	0.82	0.74	0.8	0.77	1.18	0.75	0.84
		R2		0.77		1.18				0.74	0.68	0.76	0.77	0.8	0.79	0.79	1.15	0.78	0.78
		R3		0.79		1.15				0.75	0.7	0.78	0.8	0.77	0.8	0.78	1.17	0.76	0.81
	0.78	Mean		0.78		1.17	1.17		St.de	0.0173205	0.02	0.02	0.0264575	0.03	0.01	0.01	0.0173205	0.0173205	0.03
									St.error	0.01	0.011547	0.011547	0.0152753	0.0173205	0.0057735	0.0057735	0.01	0.01	0.0173205
5	MD+HD	R1		0.75		0.81
		R2		0.75		0.84
		R3		0.78		0.78
	0.76	Mean		0.76		0.81	0.81

## Sheet: SOC % age_x000a_
	New table Table 1 Pre-sowing and Post-harvesting Soil Properties at site-I					Organic matter % age
	Treatments			PS		PH			PS	PH				PS		Ph
													1	0.82	1	0.6
													1	0.75	1	0.63
1	WO (Control)	R1		0.82		0.6		WO	0.793	0.633			1	0.81	1	0.67
		R2		0.75		0.63		FD	0.81	0.82			2	0.82	2	0.81
		R3		0.81		0.67		HD	0.79	0.79			2	0.81	2	0.84
	0.78	Mean		0.793333	0.78	0.633333	0.6	MA HD	0.81	1.32		62.96	2	0.8	2	0.8
								MD HD	0.8	0.86			3	0.76	3	0.76
2	FD	R1		0.82		0.81			0.8006	0.8846			3	0.81	3	0.8
		R2		0.81		0.84							3	0.8	3	0.8
		R3		0.8		0.8							4	0.81	4	1.28
	0.83	Mean		0.81	0.83	0.816667	0.85						4	0.79	4	1.35
													4	0.83	4	1.33
3	HD	R1		0.76		0.76							5	0.79	5	0.81
		R2		0.81		0.8							5	0.83	5	0.87
		R3		0.8		0.8							5	0.78	5	0.9
	0.77	Mean		0.79	0.77	0.786667	0.76
4	MA+HD	R1		0.81		1.28
		R2		0.79		1.35				WO		FD		HD		MA HD		MD HD
		R3		0.83		1.33				0.82	0.6	0.82	0.81	0.76	0.76	0.81	1.28	0.79	0.81
	0.81	Mean		0.81	0.81	1.32	1.32			0.75	0.63	0.81	0.84	0.81	0.8	0.79	1.35	0.83	0.87
										0.81	0.67	0.8	0.8	0.8	0.8	0.83	1.33	0.78	0.9
5	MD+HD	R1		0.79		0.81				0.793333	0.633333	0.81	0.816667	0.79	0.786667	0.81	1.32	0.8	0.86
		R2		0.83		0.87			St.de	0.0378594	0.0351188	0.01	0.0208167	0.0264575	0.023094	0.02	0.0360555	0.0264575	0.0458258
		R3		0.78		0.9			St.error	0.0218581	0.0202759	0.0057735	0.0120185	0.0152753	0.0133333	0.011547	0.0208167	0.0152753	0.0264575
	0.8	Mean		0.8	0.8	0.86	0.86

## Sheet: Avail-P (ppm)_x000a_
	New table Table 1 Pre-sowing and Post-harvesting Soil Properties at site-I						Avail-P (ppm)
	Treatments			PS		PH			PS	PH				PS		PH
													1	4.7	1	4.5
													1	5.2	1	4.5
1	WO (Control)	R1		4.7		4.5		WO	4.9	4.4			1	4.8	1	4.2
		R2		5.2		4.5		FD	4.97	5.4			2	5	2	5.5
		R3		4.8		4.2		HD	4.7	5			2	5	2	5.2
	4.9	Mean		4.9	4.9	4.4	4.4	MA HD	4.8	6.3		31.25	2	4.9	2	5.5
								MD HD	4.9	5			3	4.7	3	5.1
2	FD	R1		5		5.5			4.854	5.22			3	4.6	3	4.9
		R2		5		5.2							3	4.8	3	5
		R3		4.9		5.5							4	4.9	4	6.4
	5.1	Mean		4.96667	5.1	5.4	5.5						4	4.8	4	6.4
													4	4.7	4	6.1
3	HD	R1		4.7		5.1							5	5	5	5.2
		R2		4.6		4.9							5	5	5	4.8
		R3		4.8		5							5	4.7	5	5
	4.7	Mean		4.7		5	5
											WO		FD		HD		MA HD		MD HD
											4.7	4.5	5	5.5	4.7	5.1	4.9	6.4	5	5.2
4	MA+HD	R1		4.9		6.4					5.2	4.5	5	5.2	4.6	4.9	4.8	6.4	5	4.8
		R2		4.8		6.4					4.8	4.2	4.9	5.5	4.8	5	4.7	6.1	4.7	5
		R3		4.7		6.1					4.9	4.4	4.96667	5.4	4.7	5	4.8	6.3	4.9	5
	4.8	Mean		4.8	4.8	6.3	6.3			St.de	0.264575	0.173205	0.057735	0.173205	0.1	0.1	0.1	0.173205	0.173205	0.2
										St.error	0.152753	0.1	0.0333333	0.1	0.057735	0.057735	0.057735	0.1	0.1	0.11547
5	MD+HD	R1		5		5.2
		R2		5		4.8
		R3		4.7		5
	4.9	Mean		4.9		5	5

## Sheet: Avail-K (ppm)_x000a_
	New table Table 1 Pre-sowing and Post-harvesting Soil Properties at site-I						Avail-K (ppm)
	Treatments			PS		PH
1	WO (Control)	R1		122		110			PS	PH				PS		Ph
		R2		118		118							1	122	1	110
		R3		120		102							1	118	1	118
	120	Mean		120		110	110	WO	120	110			1	120	1	102
								FD	121.7	129.3			2	124	2	132
2	FD	R1		124		132		HD	122.7	126.7			2	121	2	126
		R2		121		126		MA HD	118	140		18.64	2	120	2	130
		R3		120		130		MD HD	119	125			3	126	3	130
	125	Mean		121.667	125	129.333	131		120.28	126.2			3	120	3	126
													3	122	3	124
3	HD	R1		126		130							4	118	4	140
		R2		120		126							4	113	4	142
		R3		122		124							4	123	4	153
	126	Mean		122.667	126	126.667	128						5	123	5	125
													5	116	5	122
													5	118	5	128
4	MA+HD	R1		118		140
		R2		113		142					WO		FD		HD		MA HD		MD HD
		R3		123		153					122	110	124	132	126	130	118	140	123	125
	118	Mean		118	118	145	145				118	118	121	126	120	126	113	142	116	122
											120	102	120	130	122	124	123	153	118	128
5	MD+HD	R1		123		125					120	110	121.667	129.333	122.667	126.667	118	145	119	125
		R2		116		122				St.de	2	8	2.08167	3.05505	3.05505	3.05505	5	7	3.60555	3
		R3		118		128				St.error	1.1547	4.6188	1.20185	1.76383	1.76383	1.76383	2.88675	4.04145	2.08167	1.73205
	119	Mean		119		125	125
