# Supplementary material for: Mycorrhizal inoculation enhanced tillering in field grown wheat, nutritional enrichment and soil properties
Source: PeerJ journal article supplement (doi:10.7717/peerj.15686), 2023-09-13
Supplement: RawData.zip [file Site 2 Soil Feb 23 2023.xlsx]

## Sheet: Saturation % age
	New table Table 1 Pre-sowing and Post-harvesting Soil Properties at site-I
	Treatments			PS		PH			PS	PH			PS		Ph
												1	44	1	41
												1	45.5	1	40
1	WO (Control)	R1		44		41		WO	44.8	41		1	44.9	1	42
		R2		45.5		40		FD	45	48		2	45	2	46.5
		R3		44.9		42		HD	42	43		2	46	2	49.5
	44.8	Mean		44.8	44.8	41	41	MA HD	43	61		2	44	2	48
								MD HD	47	50		3	45	3	42
2	FD	R1		45		46.5			44.36	48.6		3	42	3	43
		R2		46		49.5						3	44	3	41
		R3		44		48						4	44	4	64
	45	Mean		45	45	48	48					4	42	4	59
												4	43	4	60
3	HD	R1		45		42						5	43	5	47
		R2		42		43						5	48	5	49
		R3		44		41						5	45	5	50
	42	Mean		43.6667	42	42	43
										WO		FD		HD		MA HD		MD HD
4	MA+HD	R1		44		64				44	41	45	46.5	45	42	44	64	43	47
		R2		42		59				45.5	40	46	49.5	42	43	42	59	48	49
		R3		43		60				44.9	42	44	48	44	41	43	60	45	50
	43	Mean		43	43	61	61			44.8	41	45	48	43.6667	42	43	61	45.3333	48.6667
									St.de	0.754983	1	1	1.5	1.52753	1	1	2.64575	2.51661	1.52753
5	MD+HD	R1		43		47			St.error	0.43589	0.57735	0.57735	0.866025	0.881917	0.57735	0.57735	1.52753	1.45297	0.881917
		R2		48		49
		R3		45		50
	47	Mean		45.3333	47	48.6667	50

## Sheet: Soil pH
	New table Table 1 Pre-sowing and Post-harvesting Soil Properties at site-I
	Treatments			PS		PH			PS	PH			PS		Ph
												1	7	1	7
												1	7.5	1	7.3
1	WO (Control)	R1		7		7		WO	7.3	7.2		1	7.4	1	7.3
		R2		7.5		7.3		FD	7.4	7.3		2	7.2	2	7
		R3		7.4		7.3		HD	7.3	7.1		2	7.4	2	7.4
	7.3	Mean		7.3		7.2	7.2	MA HD	7.2	6.1		2	7.5	2	7.5
								MD HD	7.3	7.2		3	7.2	3	6.8
2	FD	R1		7.2		7			7.3	6.98		3	7.4	3	7.3
		R2		7.4		7.4						3	7.2	3	7.2
		R3		7.5		7.5						4	7.3	4	6.3
	7.6	Mean		7.36667	7.6	7.3	7.5					4	6.9	4	6
												4	7.4	4	6
3	HD	R1		7.2		6.8						5	7	5	7
		R2		7.4		7.3						5	7.4	5	7.2
		R3		7.2		7.2						5	7.5	5	7.4
	7.2	Mean		7.26667	7.2	7.1	7.1
										WO		FD		HD		MA HD		MD HD
										7	7	7.2	7	7.2	6.8	7.3	6.3	7	7
4	MA+HD	R1		7.3		6.3				7.5	7.3	7.4	7.4	7.4	7.3	6.9	6	7.4	7.2
		R2		6.9		6				7.4	7.3	7.5	7.5	7.2	7.2	7.4	6	7.5	7.4
		R3		7.4		6				7.3	7.2	7.36667	7.3	7.26667	7.1	7.2	6.1	7.3	7.2
	7.2	Mean		7.2		6.1	6.1		St.de	0.264575	0.173205	0.152753	0.264575	0.11547	0.264575	0.264575	0.173205	0.264575	0.2
									St.error	0.152753	0.1	0.0881917	0.152753	0.0666667	0.152753	0.152753	0.1	0.152753	0.11547
5	MD+HD	R1		7		7
		R2		7.4		7.2
		R3		7.5		7.4
	7.3	Mean		7.3		7.2	7.2

## Sheet: EC dSm-1
	New table Table 1 Pre-sowing and Post-harvesting Soil Properties at site-I
	Treatments			PS		PH
									PS	PH			PS		Ph
1	WO (Control)	R1		0.81		0.7						1	0.81	1	0.7
		R2		0.77		0.76						1	0.77	1	0.76
		R3		0.76		0.7		WO	0.78	0.72		1	0.76	1	0.7
	0.78	Mean		0.78		0.72	0.72	FD	0.8	0.82		2	0.81	2	0.82
								HD	0.8	0.81		2	0.82	2	0.84
2	FD	R1		0.81		0.82		MA HD	0.8	1.3		2	0.77	2	0.8
		R2		0.82		0.84		MD HD	0.79	0.9		3	0.82	3	0.83
		R3		0.77		0.8						3	0.8	3	0.81
	0.8	Mean		0.8		0.82	0.82					3	0.78	3	0.79
												4	0.79	4	1.28
3	HD	R1		0.82		0.83						4	0.78	4	1.3
		R2		0.8		0.81						4	0.83	4	1.34
		R3		0.78		0.79						5	0.78	5	0.89
	0.8	Mean		0.8		0.81	0.81					5	0.78	5	0.86
												5	0.81	5	0.95
4	MA+HD	R1		0.79		1.28				WO		FD		HD		MA HD		MD HD
		R2		0.78		1.3				0.81	0.7	0.81	0.82	0.82	0.83	0.79	1.28	0.78	0.89
		R3		0.83		1.34				0.77	0.76	0.82	0.84	0.8	0.81	0.78	1.3	0.78	0.86
	0.8	Mean		0.8		1.30667	1.3			0.76	0.7	0.77	0.8	0.78	0.79	0.83	1.34	0.81	0.95
										0.78	0.72	0.8	0.82	0.8	0.81	0.8	1.30667	0.79	0.9
5	MD+HD	R1		0.78		0.89			St.de	0.0264575	0.034641	0.0264575	0.02	0.02	0.02	0.0264575	0.0305505	0.0173205	0.0458258
		R2		0.78		0.86			St.error	0.0152753	0.02	0.0152753	0.011547	0.011547	0.011547	0.0152753	0.0176383	0.01	0.0264575
		R3		0.81		0.95
	0.79	Mean		0.79		0.9	0.9

## Sheet: Organic matter  % age_x000a_
	New table Table 1 Pre-sowing and Post-harvesting Soil Properties at site-2						Organic matter % age
	Treatments			PS		PH			PS	PH				PS		Ph
													1	0.89	1	0.6
													1	0.83	1	0.58
1	WO (Control)	R1		0.89		0.6		WO	0.85	0.59			1	0.83	1	0.59
		R2		0.83		0.58		FD	0.86	0.89			2	0.9	2	0.95
		R3		0.83		0.59		HD	0.86	0.85			2	0.85	2	0.86
	0.85	Mean		0.85		0.59	0.59	MA HD	0.84	1.63		97.5	2	0.83	2	0.86
								MD HD	0.85	0.85			3	0.9	3	0.9
2	FD	R1		0.9		0.95							3	0.84	3	0.81
		R2		0.85		0.86							3	0.84	3	0.84
		R3		0.83		0.86							4	0.82	4	1.69
	0.86	Mean		0.86		0.89	0.89						4	0.83	4	1.65
													4	0.87	4	1.56
3	HD	R1		0.9		0.9							5	0.83	5	0.88
		R2		0.84		0.81							5	0.83	5	0.82
		R3		0.84		0.84							5	0.88	5	0.85
	0.86	Mean		0.86		0.85	0.85
										WO		FD		HD		MA HD		MD HD
										0.89	0.6	0.9	0.95	0.9	0.9	0.82	1.69	0.83	0.88
4	MA+HD	R1		0.82		1.69				0.83	0.58	0.85	0.86	0.84	0.81	0.83	1.65	0.83	0.82
		R2		0.83		1.65				0.83	0.59	0.83	0.86	0.84	0.84	0.87	1.56	0.88	0.85
		R3		0.87		1.56				0.85	0.59	0.86	0.89	0.86	0.85	0.84	1.63333	0.846667	0.85
	0.81	Mean		0.84	0.81	1.63333	1.6		St.de	0.034641	0.01	0.0360555	0.0519615	0.034641	0.0458258	0.0264575	0.0665833	0.0288675	0.03
									St.error	0.02	0.0057735	0.0208167	0.03	0.02	0.0264575	0.0152753	0.0384419	0.0166667	0.0173205
5	MD+HD	R1		0.83		0.88
		R2		0.83		0.82
		R3		0.88		0.85
	0.8	Mean		0.846667	0.8	0.85	0.84

## Sheet: Avail-P (ppm)_x000a_
	New table Table 1 Pre-sowing and Post-harvesting Soil Properties at site-I						Avail-P (ppm)
	Treatments			PS		PH			PS	PH
1	WO (Control)	R1		4.8		4.1		WO	4.8	4				PS		Ph
		R2		5		4.1		FD	4.83	5.2			1	4.8	1	4.1
		R3		4.6		3.8		HD	5.1	5.3			1	5	1	4.1
	4.8	Mean		4.8		4	4	MA HD	5	7.2		44	1	4.6	1	3.8
								MD HD	5.1	5.3			2	5	2	5
2	FD	R1		5		5			4.966	5.4			2	4.7	2	5.1
		R2		4.7		5.1							2	4.8	2	5.5
		R3		4.8		5.5							3	5.3	3	5
	4.7	Mean		4.83333	4.7	5.2	5.1						3	5.3	3	5.2
													3	4.7	3	5.7
3	HD	R1		5.3		5							4	5	4	7.6
		R2		5.3		5.2							4	5.2	4	7
		R3		4.7		5.7							4	4.8	4	7
	5.1	Mean		5.1		5.3	5.3						5	5.2	5	5.5
													5	4.9	5	5.1
													5	5.2	5	5.3
4	MA+HD	R1		5		7.6
		R2		5.2		7				WO		FD		HD		MA HD		MD HD
		R3		4.8		7				4.8	4.1	5	5	5.3	5	5	7.6	5.2	5.5
	5	Mean		5		7.2	7.2			5	4.1	4.7	5.1	5.3	5.2	5.2	7	4.9	5.1
										4.6	3.8	4.8	5.5	4.7	5.7	4.8	7	5.2	5.3
5	MD+HD	R1		5.2		5.5				4.8	4	4.83333	5.2	5.1	5.3	5	7.2	5.1	5.3
		R2		4.9		5.1			St.de	0.2	0.173205	0.152753	0.264575	0.34641	0.360555	0.2	0.34641	0.173205	0.2
		R3		5.2		5.3			St.error	0.11547	0.1	0.0881917	0.152753	0.2	0.208167	0.11547	0.2	0.1	0.11547
	5.1	Mean		5.1		5.3	5.3

## Sheet: Avail-K (ppm)_x000a_
	New table Table 1 Pre-sowing and Post-harvesting Soil Properties at site-I						Avail-K (ppm)
	Treatments			PS		PH
										PS	PH				PS		Ph
1	WO (Control)	R1		135		109								1	135	1	109
		R2		136		117								1	136	1	117
		R3		128		110			WO	133	112			1	128	1	110
	133	Mean		133	133	112	112		FD	136	143			2	133	2	138
									HD	130.7	132.7			2	135	2	145
2	FD	R1		133		138			MA HD	134	166		23.9	2	140	2	146
		R2		135		145			MD HD	129.3	133.7			3	135	3	129
		R3		140		146								3	132	3	135
	136	Mean		136	136	143	143							3	125	3	134
														4	136	4	161
3	HD	R1		135		129								4	137	4	170
		R2		132		135								4	129	4	167
		R3		125		134								5	126	5	138
	127	Mean		130.667	127	132.667	131							5	132	5	130
														5	130	5	133
4	MA+HD	R1		136		161					WO		FD		HD		MA HD		MD HD
		R2		137		170					135	109	133	138	135	129	136	161	126	138
		R3		129		167					136	117	135	145	132	135	137	170	132	130
	134	Mean		134	134	166	166				128	110	140	146	125	134	129	167	130	133
											133	112	136	143	130.667	132.667	134	166	129.333	133.667
5	MD+HD	R1		126		138				St.de	4.3589	4.3589	3.60555	4.3589	5.1316	3.21455	4.3589	4.58258	3.05505	4.04145
		R2		132		130				St.error	2.51661	2.51661	2.08167	2.51661	2.96273	1.85592	2.51661	2.64575	1.76383	2.33333
		R3		130		133
	128	Mean		129.333	128	133.667	132
